# Supplementary material
Source: PubMed Central journal article supplement (PMC3367236)
Supplement: embor201240s2.pdf [file embor201240s2.pdf]

Manuscript EMBOR-2011-35491

**Neurl4, a novel daughter centriole protein, prevents formation of ectopic microtubule organizing centers**

Ji Li, Sehyun Kim, Tetsuo Kobayashi, Feng-Xia Liang, Nina Korzeniewski, Stefan Duensing and Brian D. Dynlacht

*Corresponding author: Brian D. Dynlacht, New York University School of Medicine*

---

**Review timeline:**

Submission date:

18 October 2011

Accepted:

29 February 2012

---

**Transaction Report:**

No Peer Review Process File is available with this article, as the authors have chosen not to make the review process public in this case.
